# Supplementary material for: The 'evolvability' of promiscuous protein functions
Source: Springer Nature journal article supplement (doi:10.1038/ng1482), 2004-11-28
Supplement: ng1482-S9.pdf [file ng1482-S9.pdf]

## Supplementary Table 8

### The evolvability of promiscuous protein functions

Amir Aharoni, Leonid Gaidukov, Olga Khersonsky, Stephen McQ. Gould, Cintia Roodveldt and Dan S. Tawfik

Examples for variants exhibiting large improvements in promiscuous activities and small changes in native activity<sup>a</sup>

| Enzyme                                                       | Variant name | Type of <b>native activity</b> and fold change relative to the wt <sup>b</sup> | Type of <b>promiscuous activity</b> and fold change relative to the wt <sup>b</sup>            | Mutations <sup>c</sup>                 | Reference |
|--------------------------------------------------------------|--------------|--------------------------------------------------------------------------------|------------------------------------------------------------------------------------------------|----------------------------------------|-----------|
| 1. Bipheyl dioxygenase (KF707 and LB400)                     | pSHF1003     | Oxygenation of chlorinated biphenyls<br><b>1.4-1.8</b>                         | Oxygenation activity for toluene and benzene<br><b>&gt;100<sup>d</sup></b>                     | Shuffled gene                          | 1         |
| 2. Heart myoglobin                                           | -            | Binding of CO and O <sub>2</sub><br><b>0.82-0.98</b>                           | Peroxidase activity<br><b>25</b>                                                               | T39I,K45D<br>F46L I107F                | 2         |
| 3. Cytochrome c peroxidase <sup>e</sup>                      | AN5          | Oxidation of cytochrome c<br><b>0.95</b>                                       | Oxidation of guaiacol<br><b>300</b>                                                            | V5I,<br>R48H,T180A,<br>D224V,<br>S282D | 3         |
| 4. Cytochrome P450 BM3                                       | 139-3        | Hydroxylation of lauric and palmitic acid<br><b>~0.3<sup>f</sup></b>           | Hydroxylation of hexane<br><b>20<sup>f</sup></b>                                               | 11 mutations <sup>g</sup>              | 4         |
| 5. Galactokinase (GalK)                                      | -            | Phosphorylation of D-galactose<br><b>0.8</b>                                   | Phosphorylation activity for various promiscuous D and L sugars<br><b>5.1-40.1<sup>h</sup></b> | Y371H                                  | 5         |
| 6. N-acetylneuraminate (NAL) ( <i>E. coli</i> ) <sup>i</sup> | -            | Glycolysis of Neu5Ac<br><b>0.3</b>                                             | Aldol condensation<br><b>19</b>                                                                | L142R                                  | 6         |
| 7. Lipase                                                    | M2           | Lipase <sup>j</sup> (triolein)<br><b>0.8</b>                                   | Phospholipase <sup>j</sup> (lecithin)<br><b>9.8</b>                                            | H15P<br>K103R,<br>N173S.               | 7         |
| 8. Cre recombinase <sup>k</sup>                              | Fre 17       | Recombination of Lox P sites<br><b>1.15</b>                                    | Recombination of Lox H sites<br><b>220</b>                                                     | S2P, V7L,<br>N10D,<br>H196Q,<br>E262Q  | 8         |

|                                                      |                      |                                                                                                |                                                                                                                          |                                                                        |    |
|------------------------------------------------------|----------------------|------------------------------------------------------------------------------------------------|--------------------------------------------------------------------------------------------------------------------------|------------------------------------------------------------------------|----|
| 9. Subtilisin <sup>l</sup>                           | GES208               | Peptidase activity<br><b>0.4</b>                                                               | Esterase activity<br><b>25</b>                                                                                           | V143H,<br>D181N                                                        | 9  |
| 10. Muconate lactonizing enzyme (MLE II)             | E323G                | MLE activity (muconate)<br><b>0.07</b>                                                         | OSBS activity ( $\beta$ elimination)<br><b><math>\sim 10^6</math></b>                                                    | E323G                                                                  | 10 |
| 11. PBP2X DD-transpeptidase                          | MutE                 | DD-peptidase activity<br><b>1.5</b>                                                            | Lactamase activity (cefotaxime)<br><b><math>\sim 10^5</math></b>                                                         | G336A,F450L<br>Q452H                                                   | 11 |
| 12. $\beta$ -Glucuronidase                           | variant <sup>p</sup> | Hydrolysis of pNP glucuronide, pNP galacturonide and pNP-glucoside<br><b>0.1-1<sup>m</sup></b> | Hydrolysis of pNP-fucoside, oNP-galactoside-6-phosphate and pNP galactoside.<br><b>20-200<sup>m</sup></b>                | T509A,D531E,<br>S557P, N566S                                           | 12 |
| 13. $\alpha$ -lytic protease <sup>l</sup>            | M192A                | Peptidase activity Ala at the P1 position<br><b>0.5</b>                                        | Peptidase activity Phe at P1 position<br><b><math>8.4 \cdot 10^5</math></b><br>Leu<br><b><math>2.4 \cdot 10^4</math></b> | M192A                                                                  | 13 |
| 14. Triazine hydrolase                               | variant 12           | Dechlorination <sup>n</sup> and deamination of atrazine and amino atrazine.<br><b>0.2-1.5</b>  | Dechlorination <sup>m,n</sup> and deamination of different triazines<br><b>13.3-1550</b>                                 | Shuffled gene (AtzA and TriA)                                          | 14 |
| 15. Stoeffel fragment of Taq polymerase I            | SF2                  | Incorporation of dNTPs<br><b><math>\sim 0.1</math></b>                                         | Incorporation of rNTPs<br><b><math>10^2-10^4</math></b>                                                                  | A597T, E615G                                                           | 15 |
| 16. Stoeffel fragment of Taq polymerase I            | SFM19                | Incorporation of dNTPs<br><b>0.3-20</b>                                                        | Incorporation of 2O-methyl ribonucleoside <sup>m</sup><br><b><math>&gt;10^4</math></b>                                   | I614E,E615G                                                            | 16 |
| 17. Glutathione transferase A1-1 <sup>i</sup>        | GIMFhelix            | Aromatic substitution of CDNB<br><b>0.09</b>                                                   | Michael addition reaction hexenal and nonenal<br><b>94 - 304.</b>                                                        | Grafting residues and structural elements from GST A4-4 <sup>o</sup> . | 17 |
| 18. Human estrogen receptor $\alpha$ (hER $\alpha$ ) | T7-18                | Binding affinity to 17 $\beta$ -Estradiol (E2)<br><b>0.3-0.6</b>                               | Binding affinity to testosterone<br><b><math>7.6 \cdot 10^3</math></b>                                                   | E353Q,F461I,<br>A569T                                                  | 18 |

<sup>a</sup> This Table summarizes the results of an extensive search of the directed evolution literature. In most cases, however, data are available only for the final variants of the evolutionary process that were often selected for maximum increase in the

promiscuous (evolved) activity, and lowest native activity. The examples listed here were taken from experiments in which there was no selection pressure for a decrease in the native activity, or, where data regarding the intermediates of the evolutionary process were available. Listed are variants that show the highest improvement in the promiscuous activity and the lowest change in the natural activity.

<sup>b</sup> Comparison between the improved variants and the wt (wild-type) is based on the  $k_{cat}/K_M$  for enzymatic activities and binding constants for changes in binding activity.

<sup>c</sup> Mutations are shown for variants generated by random mutagenesis and/or DNA shuffling of a single gene.

<sup>d</sup> Catalytic activity of pSHF 1003 and the two parental wt proteins (KF707 and LB400) for toluene and benzene could not be detected. We therefore assumed that the improvement was >100fold.

<sup>e</sup> First order rate constants of the oxidation of cytochrome C and guaiacol are used for comparison of the wt and the improved variant AN5.

<sup>f</sup> Maximum turnover rates (mol substrate/min/mol enzyme) of the hydroxylation of lauric acid, palmitic acid and hexane are used for comparison of the wt and the improved variant 139-3.

<sup>g</sup> See reference for specific mutations.

<sup>h</sup> Phosphorylation activity for D-talose, 6-Amino-D-galactose, D-galacturonic acid, L-Altrose and L- glucose are not reported for the wt GalK, the maximal improvement shown in the table (40.1-fold) is based on the lower limit of detection ( $k_{cat}/K_M$  of  $0.6 \text{ s}^{-1}\text{M}^{-1}$ ) for 6-Deoxy-D-galactose for the wt enzyme.

<sup>i</sup> Variants characterized in this work were generated by rational design.

<sup>j</sup> Units activity per mg of enzyme of the lipase and phospholipase activity with tributyrin and lecithin are used for comparison of the wt and the improved variant M2.

<sup>k</sup> This work involves 35 generation cycles, only one variant from generation 17 (Fre 17) is shown. Fre 17 variant was characterized in details for recombination activity in *E. coli* by the number of Kan resistance colonies.

<sup>l</sup> Initial rates ( $\mu\text{M}$  product/100  $\mu\text{l}$  of induced cell lysate/min) of the amidase and esterase activity are used for comparison of the wt and the improved variant GES208.

<sup>m</sup> Comparison between the wt and the evolved variant are only estimated numbers and reflect the lowest activity changes.

<sup>n</sup> Initial rates ( $\mu\text{M}$  product/h) were measured on crude cell lysates containing  $\sim 40\text{ng}$  of enzyme in 100  $\mu\text{l}$  reaction.

<sup>o</sup> GIMFhelix was created by grafting the GST A4-4 residues 12, 107, 108, 111 and the C terminal peptide (residues 208-222)

<sup>p</sup> This variant is an intermediate in the directed evolution of  $\beta$ -glucuronidase towards  $\beta$ -galactosidase and was isolated after two rounds of evolution.

## References

1. Kumamaru, T., Suenaga, H., Mitsuoka, M., Watanabe, T. & Furukawa, K. Enhanced degradation of polychlorinated biphenyls by directed evolution of biphenyl dioxygenase. *Nat Biotechnol.* **16**, 663-6 (1998).
2. Wan, L., Twitchett, M. B., Eltis, L. D., Mauk, A. G. & Smith, M. In vitro evolution of horse heart myoglobin to increase peroxidase activity. *Proc Natl Acad Sci U S A* **95**, 12825-31 (1998).
3. Iffland, A., Tafelmeyer, P., Saudan, C. & Johnsson, K. Directed molecular evolution of cytochrome c peroxidase. *Biochemistry* **39**, 10790-98 (2000).
4. Glieder, A., Farinas, E. T. & Arnold, F. H. Laboratory evolution of a soluble, self-sufficient, highly active alkane hydroxylase. *Nat Biotechnol.* **20**, 1135-9 (2002).
5. Hoffmeister, D., Yang, J., Liu, L. & Thorson, J. Creation of the first anomeric D/L-sugar kinase by means of directed evolution. *Proc Natl Acad Sci U S A* **100**, 13184-9 (2003).
6. Joerger, A. C., Mayer, S. & Fersht, A. R. Mimicking natural evolution in vitro: an N-acetylneuraminidase mutant with an increased dihydrodipicolinate synthase activity. *Proc Natl Acad Sci U S A* **100**, 5694-9 (2003).
7. Kauffmann, I. & Schmidt-Dannert, C. Conversion of *Bacillus thermocatenulatus* lipase into an efficient phospholipase with increased activity towards long-chain fatty acyl substrates by directed evolution and rational design. *Protein Eng* **14**, 919-928 (2001).
8. Buchholz, F. & Stewart, A. F. Alteration of Cre recombinase site specificity by substrate-linked protein evolution. *Nat Biotechnol.* **19**, 1047-52 (2001).
9. Sroga, G. E. & Dordick, J. S. Generation of a broad esterolytic subtilisin using combined molecular evolution and periplasmic expression. *Protein Eng* **14**, 929-937 (2001).
10. Schmidt, D. M. et al. Evolutionary potential of (beta/alpha)<sub>8</sub>-barrels: functional promiscuity produced by single substitutions in the enolase superfamily. **42**, 8387-93 (2003).
11. Peimbert, M. & Segovia, L. Evolutionary engineering of a beta-Lactamase activity on a D-Ala D-Ala transpeptidase fold. *Protein Eng* **16**, 27-35 (2003).
12. Matsumura, I. & Ellington, A. D. In vitro evolution of beta-glucuronidase into a beta-galactosidase proceeds through non-specific intermediates. *J. Mol. Biol.* **305**, 331-9 (2001).
13. Bone, R., Silen, J. L. & Agard, D. A. Structural plasticity broadens the specificity of an engineered protease. *Nature* **339**, 191-195 (1989).
14. Raillard, S. et al. Novel enzyme activities and functional plasticity revealed by recombining highly homologous enzymes. *Chem. Biol.* **8**, 891-8 (2001).
15. Xia, G. et al. Directed evolution of novel polymerase activities: mutation of a DNA polymerase into an efficient RNA polymerase. *Proc Natl Acad Sci U S A* **99**, 6597-602 (2002).
16. Fa, M., Radeghieri, A., Henry, A. A. & Romesberg, F. E. Expanding the substrate repertoire of a DNA polymerase by directed evolution. *J. Am. Chem. Soc.* **126**, 1748-54 (2004).

17. Nilsson, L. O., Gustafsson, A. & Mannervik, B. Redesign of substrate-selectivity determining modules of glutathione transferase A1-1 installs high catalytic efficiency with toxic alkenal products of lipid peroxidation. *Proc Natl Acad Sci U S A* **97**, 9408-12 (2000).
18. Chen, Z., Katzenellenbogen, B., Katzenellenbogen, J. A. & Zhao, H. Directed evolution of human estrogen receptor variants with significantly enhanced androgen specificity and affinity. *J Biol Chem* **in press** (2004).
